# Supplementary material for: Adenosine Derivates as Antioxidant Agents: Synthesis, Characterization, in Vitro Activity, and Theoretical Insights
Source: PubMed Central journal article supplement (PMC6826950; doi:10.3390/antiox8100468), 2019-10-09

# Adenosine derivatives as antioxidant agents: synthesis, characterization, *in vitro* activity and theoretical insights.

Francisco Valdes<sup>2</sup>, Nelson Brown<sup>3</sup>, Alejandro Morales-Bayuelo<sup>4</sup>, Luis Prent-Peñaloza<sup>1</sup>, Margarita Gutierrez<sup>2</sup>

<sup>1</sup> Organic Synthesis Laboratory and Biological Activity (LSO-Act-Bio), PhD Applied Sciences, faculty of Engineering and Institute of Chemistry of Natural Resources, Universidad de Talca, Casilla 747, Talca 3460000, Chile. luisprent@gmail.com

<sup>2</sup> Organic Synthesis Laboratory and Biological Activity (LSO-Act-Bio), PhD sciences mention investigation and development of bioactive products, Institute of Chemistry of Natural Resources, Universidad de Talca, Casilla 747, Talca 3460000, Chile. franciscovaldesz@hotmail.es

<sup>3</sup> Center for Medical Research, University of Talca School of Medicine, 3460000 Talca, Chile; Programa de Investigación Asociativa en Cáncer Gástrico (PIA-CG), Universidad de Talca. nbrown@utalca.cl

<sup>4</sup> Centro de Investigación de Procesos del Tecnológico Comfenalco (CIPTEC), programa de Ingeniería Industrial, Fundación Universitaria Tecnológico Comfenalco – Cartagena, Cr 44 D N 30A, 91, Cartagena-Bolívar, 130001 Colombia. alejandromoraba@hotmail.com

## SUPPLEMENTARY MATERIAL

### CONTENTS

**Figure S1.** IR, <sup>1</sup>H and <sup>13</sup>C nuclear magnetic resonance (NMR) spectra of compound **1a**.....3

**Figure S2.** IR, <sup>1</sup>H and <sup>13</sup>C nuclear magnetic resonance (NMR) spectra of compound **1b**.....4

**Figure S3.** IR, <sup>1</sup>H and <sup>13</sup>C nuclear magnetic resonance (NMR) spectra of compound **1c**.....5

**Figure S4.** IR, <sup>1</sup>H and <sup>13</sup>C nuclear magnetic resonance (NMR) spectra of compound **2**.....6

**Figure S5.** IR, <sup>1</sup>H and <sup>13</sup>C nuclear magnetic resonance (NMR) spectra of compound **3**.....7

**Figure S6.** IR, <sup>1</sup>H and <sup>13</sup>C nuclear magnetic resonance (NMR) spectra of compound **4**.....8

**Figure S7.** IR, <sup>1</sup>H and <sup>13</sup>C nuclear magnetic resonance (NMR) spectra of compound **5**.....9

**Figure S1. Compound 1a:** 2-(6-butylamino-purin-9-yl)-5-hydroxymethyl-tetrahydro-furan-3,4-diol  
IR (KBr):

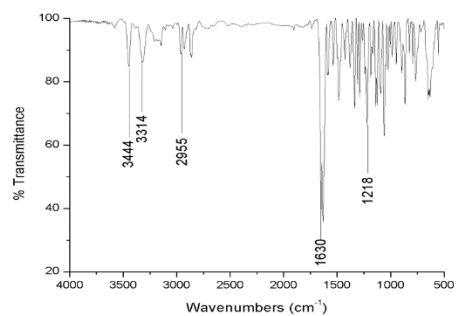

<sup>1</sup>H-RMN (DMSO-d<sub>6</sub>, 400MHz)

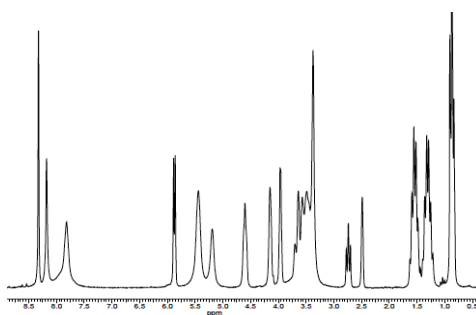

<sup>13</sup>C-RMN (DMSO-d<sub>6</sub>, 100 MHz)

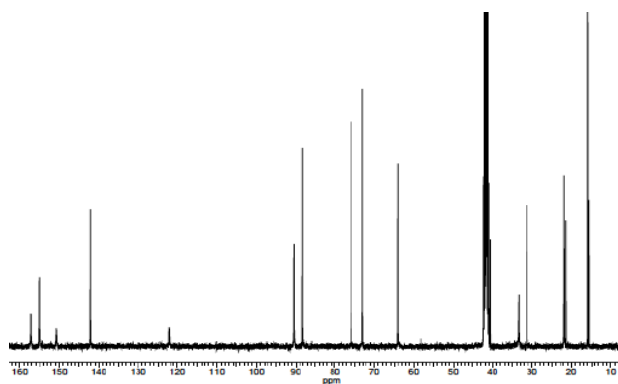

**Figure S2. Compound 1b:** 2-[6-(5-amino-2-methyl-pentylamino)-purin-9-yl]-5-hydroxymethyl-tetrahydrofuran-3,4-diol

IR (KBr):

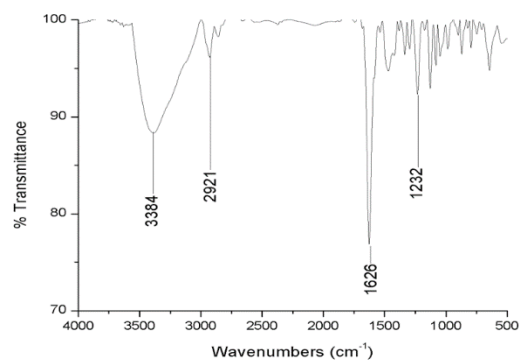

<sup>1</sup>H-RMN (DMSO-d<sub>6</sub>, 400 MHz)

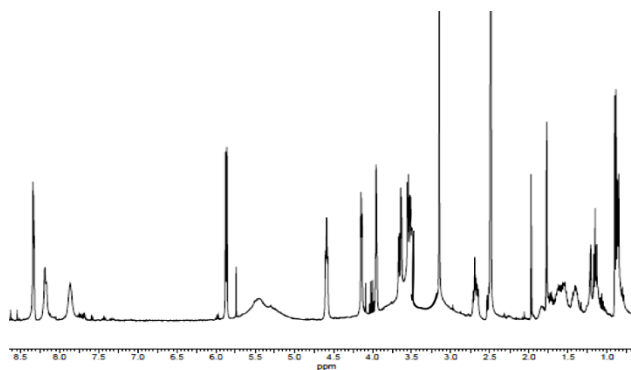

<sup>13</sup>C-RMN (DMSO-d<sub>6</sub>, 100 MHz)

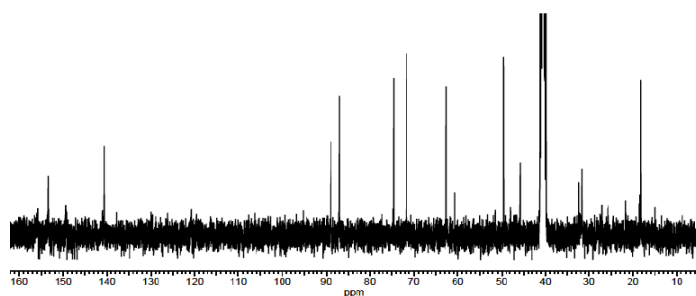

**Figure S3. Compound 1c:** 2-[6-(3-propylamino)-purin-9-yl]-5-hydroxymethyl-tetrahydro-furan-3,4-diol  
IR (KBr):

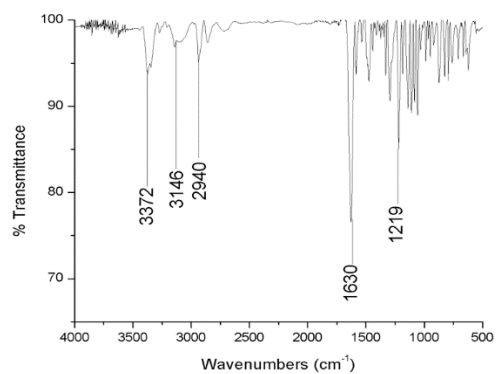

<sup>1</sup>H-RMN (DMSO-d<sub>6</sub>, 400 MHz)

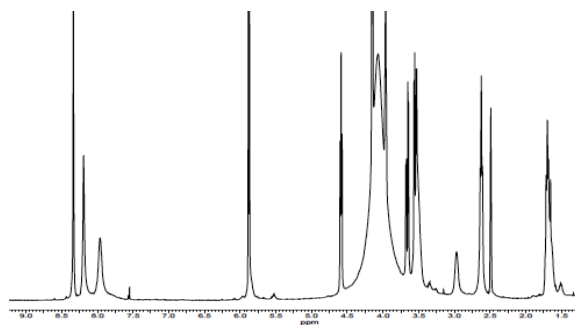

<sup>13</sup>C-RMN (DMSO-d<sub>6</sub>, 100 MHz)

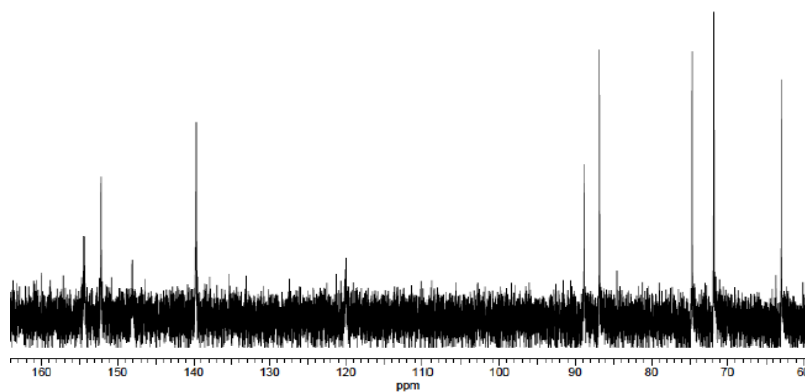

**Figure S4. Compound 2:** [6-(6-Chloro-purin-9-yl)-2,2-dimethyl-tetrahydro-furo[3,4-d][1,3]dioxol-4-yl]-methanol

IR (KBr):

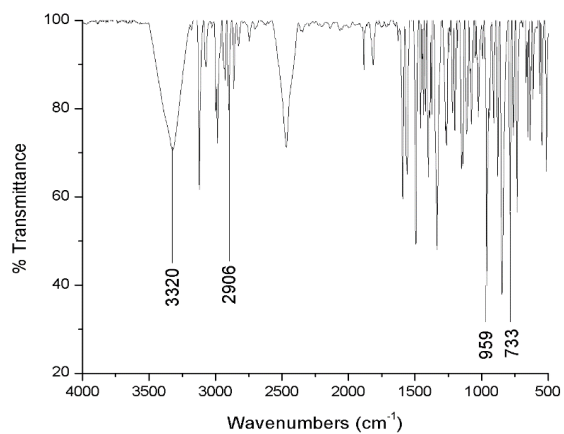

<sup>1</sup>H-RMN (DMSO-d<sub>6</sub>, 400 MHz)

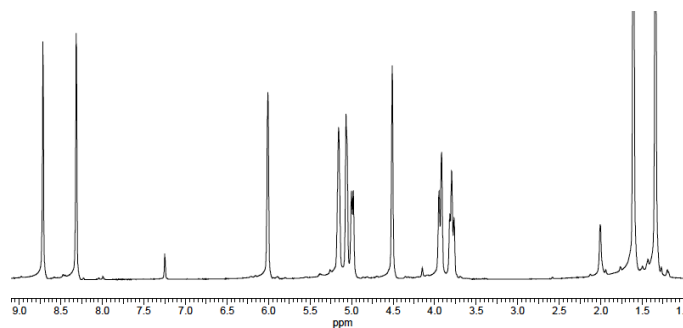

<sup>13</sup>C-RMN (DMSO-d<sub>6</sub>, 100 MHz)

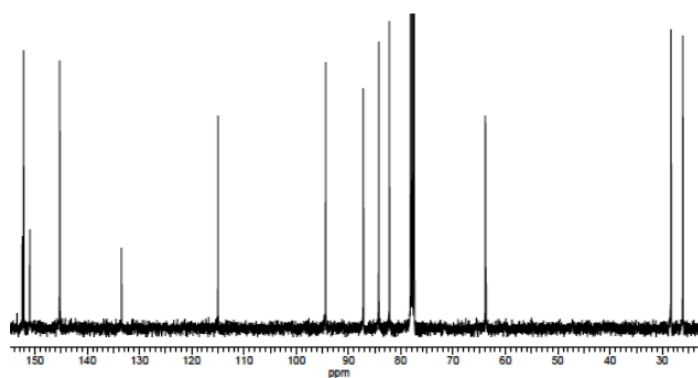

**Figure S5. Compound 3:** 6-(6-Chloro-purin-9-yl)-2,2-dimethyl-tetrahydro-furo[3,4-d][1,3]dioxole-4-carboxylic acid

IR (KBr):

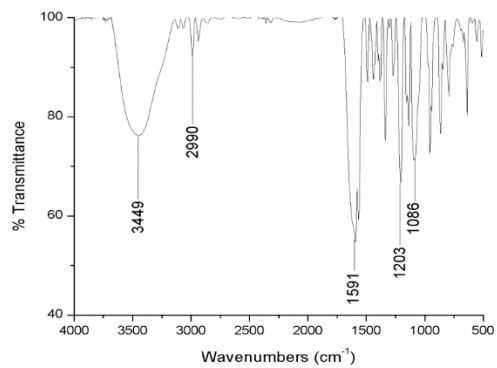

<sup>1</sup>H-RMN (DMSO-d<sub>6</sub>, 400 MHz)

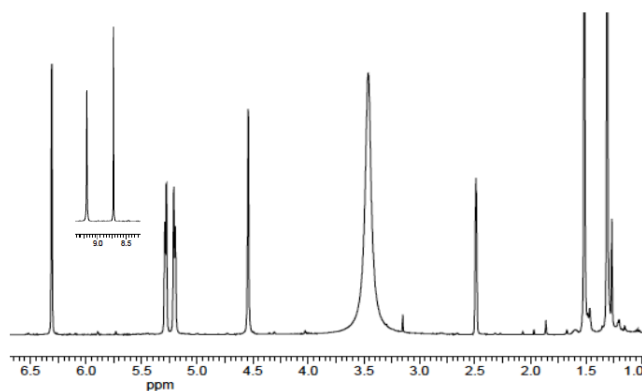

<sup>13</sup>C-RMN (DMSO-d<sub>6</sub>, 100 MHz)

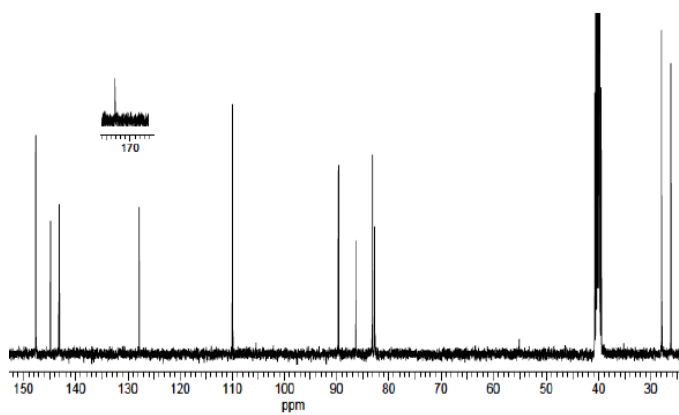

**Figure S6. Compound 4:** *1'-deoxy-1'-(6-chloro-9H-purin-9-yl)-β-D-ribofuranuronic acid*

IR (KBr):

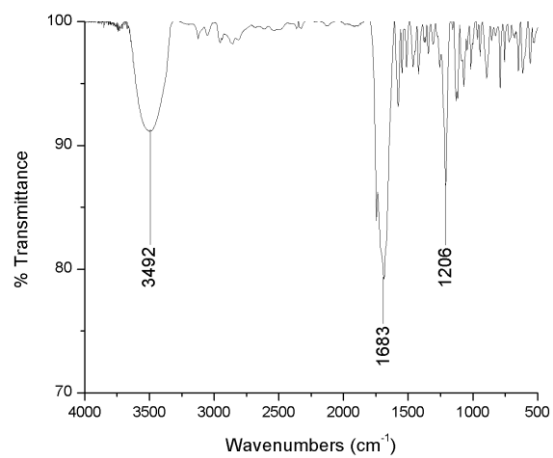

<sup>1</sup>H-RMN (DMSO-d<sub>6</sub>, 400 MHz)

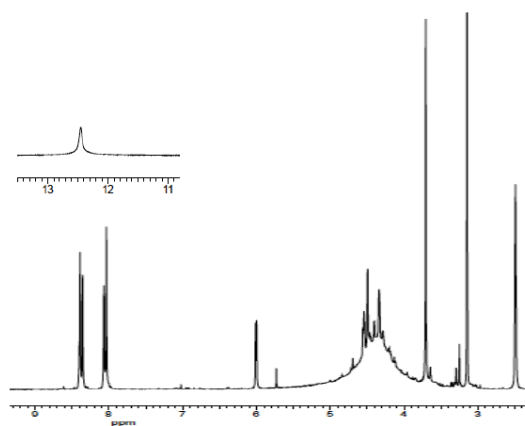

<sup>13</sup>C-RMN (DMSO-d<sub>6</sub>, 100 MHz)

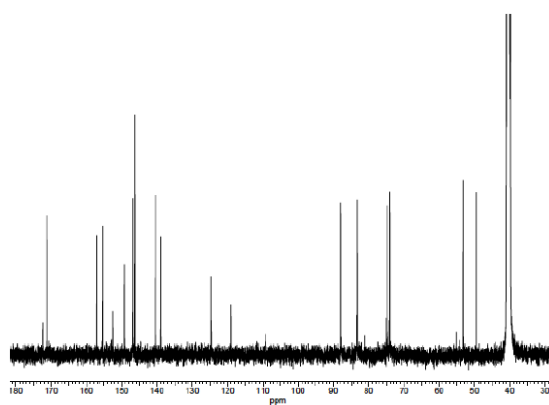

**Figure S7. Compound 5:** 6 - [(4-amino-2,3,5-triazole) thio] - $\beta$ -D-ribofuranosyl-9H-purine-5'-N-ethyluronamide

IR (KBr):

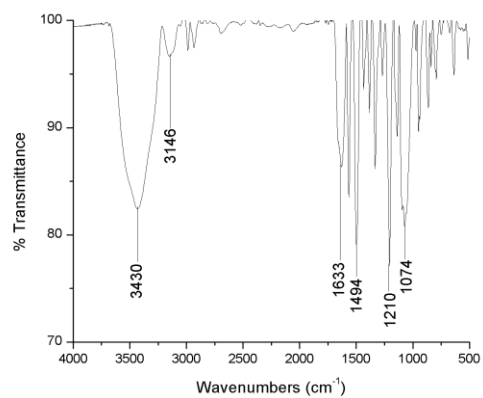

<sup>1</sup>H-RMN (DMSO-d<sub>6</sub>, 400 MHz)

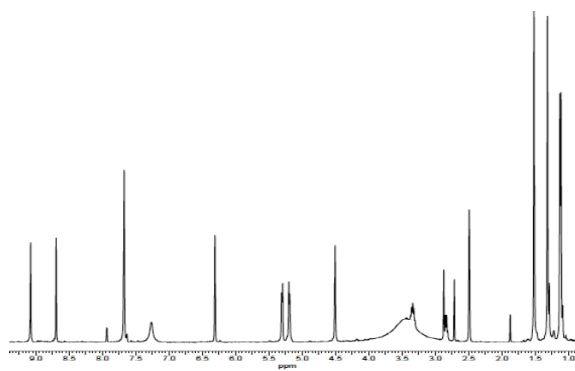

<sup>13</sup>C-RMN (DMSO-d<sub>6</sub>, 100 MHz)

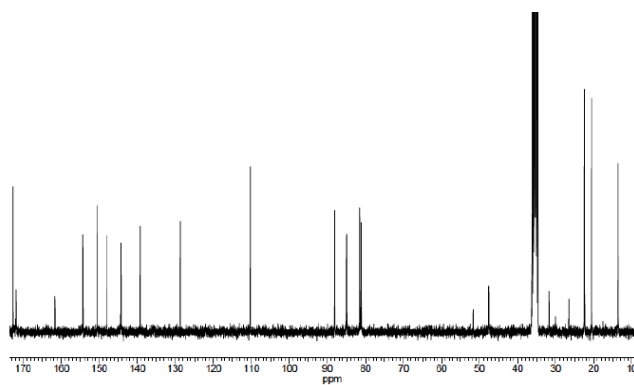

Supplement: antioxidants-08-00468-s001.pdf [file antioxidants-08-00468-s001.pdf]
